# Supplementary material
Source: PubMed Central journal article supplement (PMC2667782)

### **Supplemental figures**

S1A) The different cell types were transfected with TOPflash or FOPflash and Renilla control vectors and were either left unstimulated or stimulated with rWnt-5a. The relative luciferase units (RLU) and the subsequent ratio of TOP/FOP were calculated for each sample.

S1B) Time kinetics of treatment with the CKI inhibitor indicates that the total levels of E-cadherin or  $\beta$ -catenin protein were not reduced upon addition of the CKI inhibitor at the times used in the immuno-coprecipitation experiments.

S1C) The reverse experiments, immunoprecipitation of E-cadherin and coprecipitation of  $\beta$ -catenin, show a 1:1 ratio of  $\beta$ -catenin/E-cadherin but the levels of coprecipitated Ser45 phosphorylated  $\beta$ -catenin is increased upon Wnt-5a stimulation.

S1D) Immuno-coprecipitation of CKI $\alpha$  and  $\beta$ -catenin with Axin. Both proteins show enhanced binding with Axin upon Wnt-5a stimulation. The blots were reprobbed with Axin specific antibodies.

S1E) Immuno-coprecipitation of  $\beta$ -catenin and E-cadherin with  $\alpha$ -catenin.  $\beta$ -catenin and E-cadherin show enhanced binding to  $\alpha$ -catenin upon Wnt-5a stimulation. The blots were reprobbed with  $\alpha$ -catenin specific antibodies.

S2A) Statistics of the Wnt-5a/CKI induced  $\beta$ -catenin/E-cadherin complex formation in two different breast cancer cell lines MCF-7 and 4T1. The blots shown in Fig. 6 D, are representative of several separate experiments and OD measurements of the band intensities were performed to quantify the differences. Error bars indicate SEM, n=8, p<0.05 \*, p<0.01\*\*.

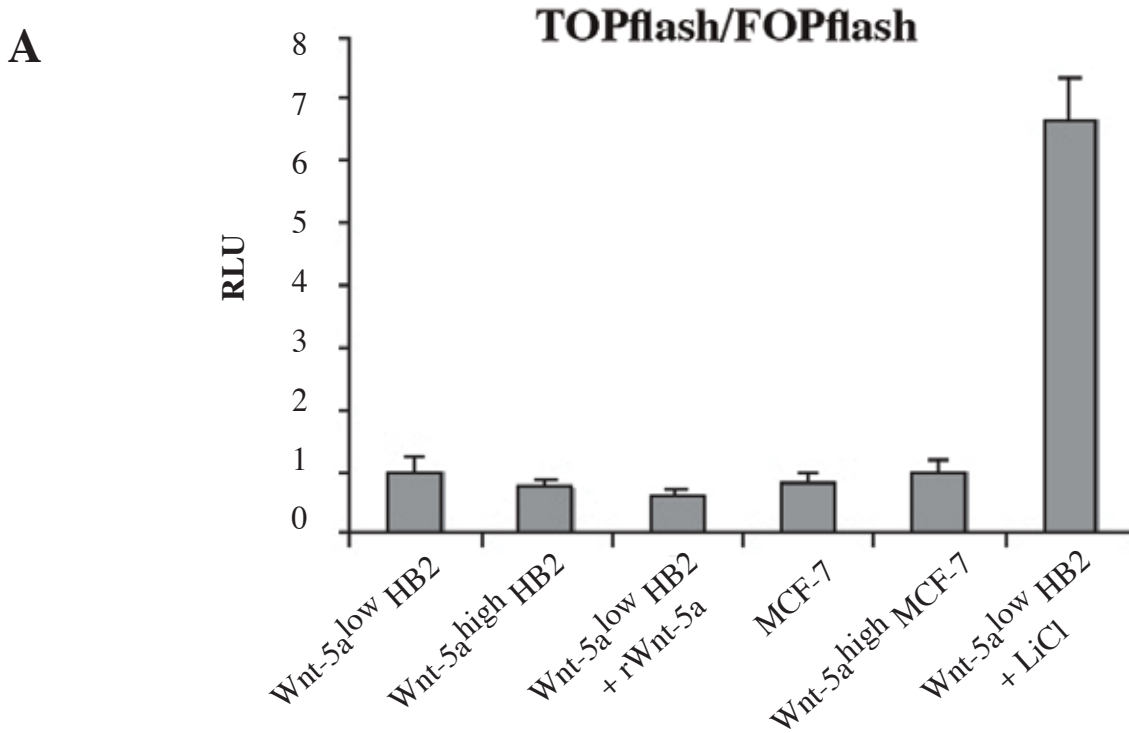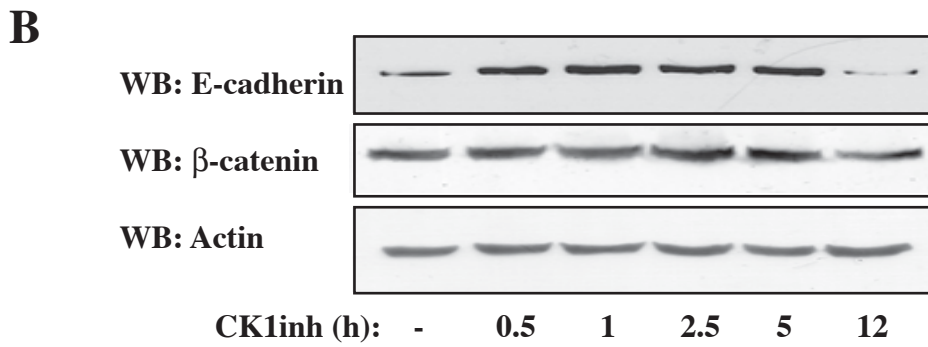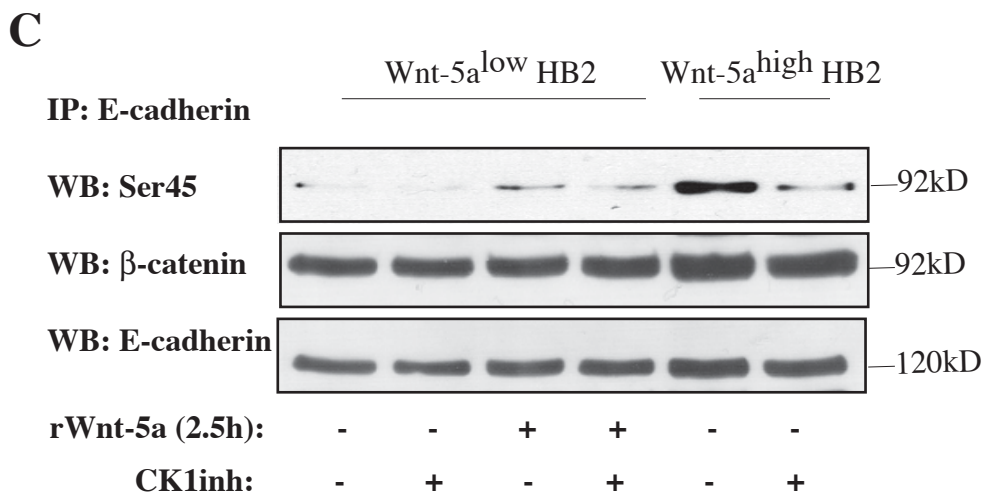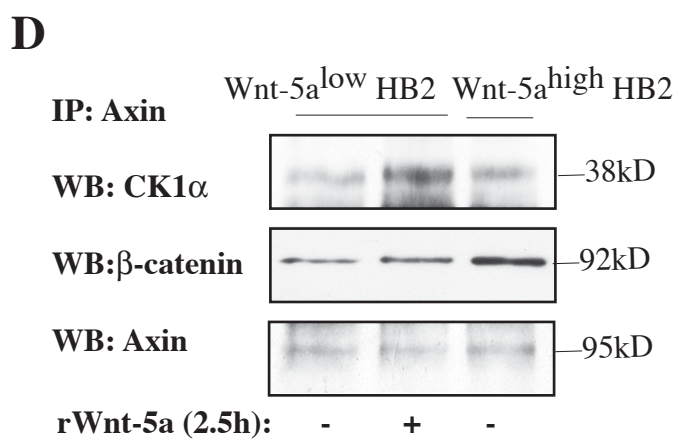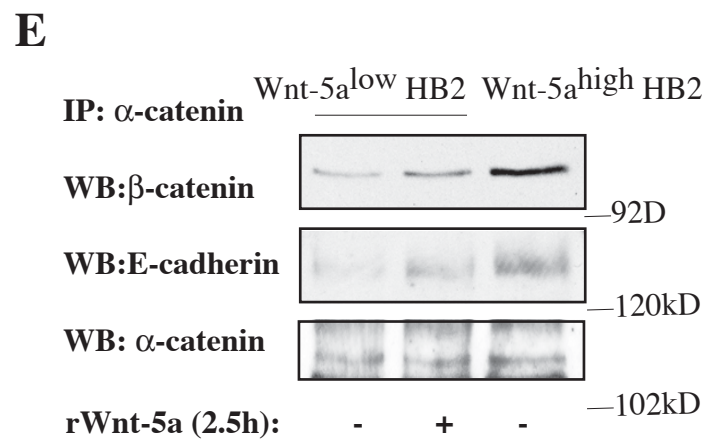

# Supplementary 2

## A

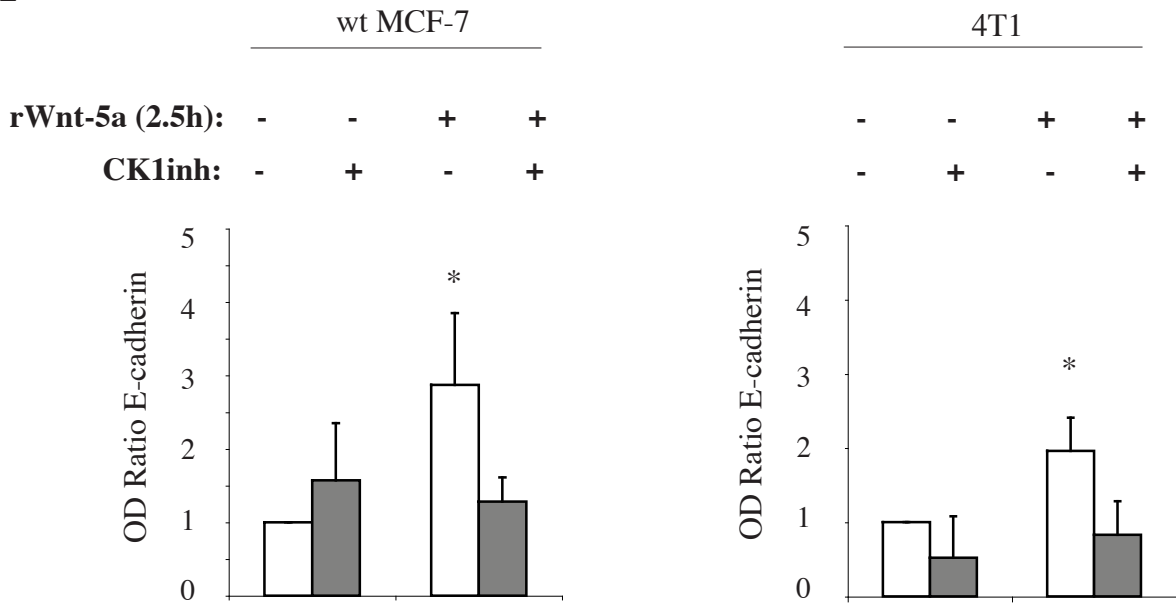

Supplement: M804923200_1.pdf [file M804923200_1.pdf]
